# Supplementary material for: Widespread Use of Non-productive Alternative Splice Sites in Saccharomyces cerevisiae
Source: PubMed Central journal article supplement (PMC3983031; doi:10.1371/journal.pgen.1004249), 2014-04-10

**A**

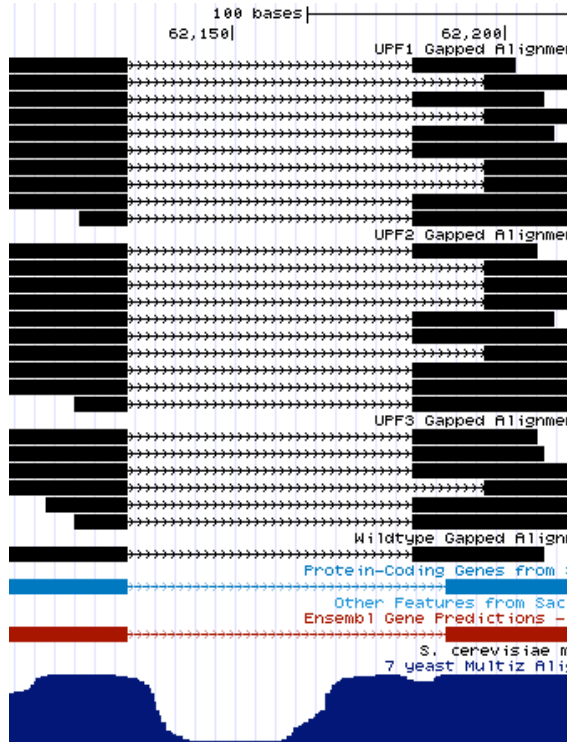

**B**

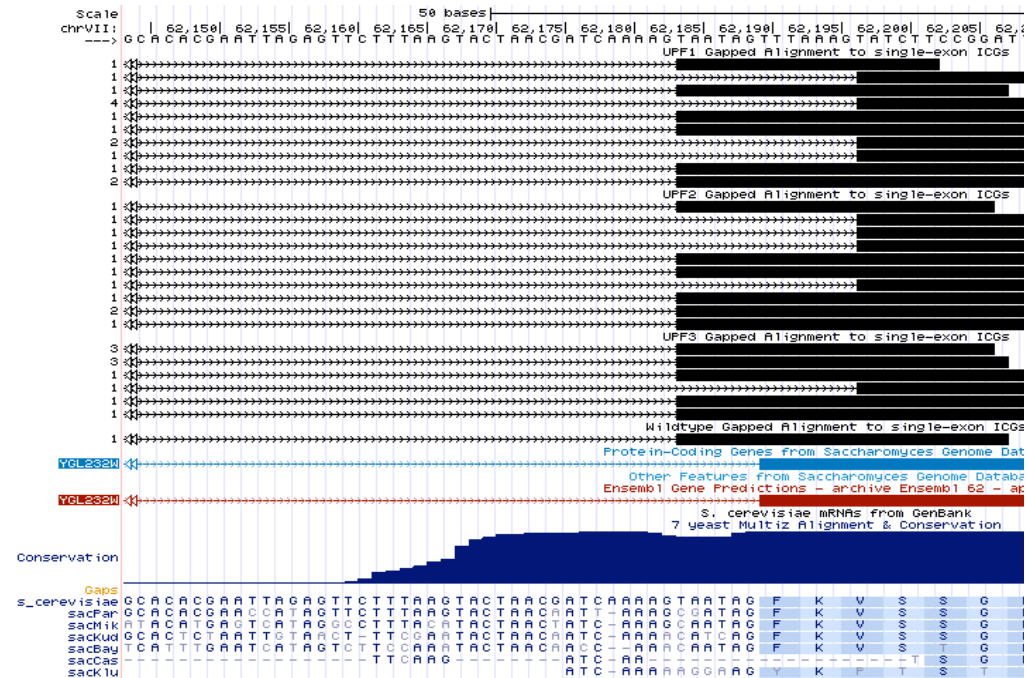

Supplement: pgen.1004249.s009.pdf [file pgen.1004249.s009.pdf]
